# Supplementary material
Source: ML conference proceedings conference paper supplement (https://proceedings.neurips.cc/paper_files/paper/2019/hash/fa3060edb66e6ff4507886f9912e1ab9-Abstract.html)
Supplement: Supplementary file [file fa3060edb66e6ff4507886f9912e1ab9-Supplemental.zip]

## A Omitted proofs for the main algorithm's guarantees

In this section we present the proofs omitted from Sections 2 and 3, which regarded the correctness and efficiency of DPP-VFX. We start by showing that multiple samples drawn using the same Nyström approximation are independent.

**Lemma 5 (restated Lemma 1)** *Let  $C \subseteq [n]$  be a random set variable with any distribution. Suppose that  $S_1$  and  $S_2$  are returned by two executions of DPP-VFX, both using inputs constructed from the same  $\mathbf{L}$  and  $\hat{\mathbf{L}} = \mathbf{L}_{\mathcal{I},C} \mathbf{L}_C^\dagger \mathbf{L}_{C,\mathcal{I}}$ . Then  $S_1$  and  $S_2$  are (unconditionally) independent.*

**Proof** Let  $A$  and  $B$  be two subsets of  $[n]$  representing elementary events for  $S_1$  and  $C$ , respectively. Theorem 2 implies that

$$\Pr(S_1 = A \mid C = B) = \frac{\det(\mathbf{L}_A)}{\det(\mathbf{I} + \mathbf{L})} = \Pr(S_1 = A).$$

Now, for any  $A_1, A_2 \subseteq [n]$  representing elementary events for  $S_1$  and  $S_2$  we have that

$$\begin{aligned} \Pr(S_1 = A_1 \wedge S_2 = A_2) &= \sum_{B \in [n]} \Pr(S_1 = A_1 \wedge S_2 = A_2 \mid C = B) \Pr(C = B) \\ &= \sum_{B \in [n]} \Pr(S_1 = A_1 \mid C = B) \Pr(S_2 = A_2 \mid C = B) \Pr(C = B) \\ &= \Pr(S_1 = A_1) \Pr(S_2 = A_2) \sum_{B \in [n]} \Pr(C = B). \end{aligned}$$

Since  $\sum_{B \in [n]} \Pr(C = B) = 1$ , we get that  $S_1$  and  $S_2$  are independent.  $\blacksquare$

We now bound the precompute cost, starting with the construction of the Nyström approximation  $\hat{\mathbf{L}}$ .

**Lemma 6 (restated Lemma 2)** *Let  $\hat{\mathbf{L}}$  be constructed by sampling  $m = \mathcal{O}(k^3 \log \frac{n}{\delta})$  columns proportionally to their RLS. Then, with probability  $1 - \delta$ ,  $\hat{\mathbf{L}}$  satisfies the assumption of Theorem 3.*

**Proof** Let  $\mathbf{L} = \mathbf{B}\mathbf{B}^\top$  and  $\hat{\mathbf{L}} = \mathbf{B}\mathbf{P}\mathbf{B}^\top$ , where  $\mathbf{P}$  is a projection matrix. Using algebraic manipulations we get

$$s = \text{tr}(\mathbf{L} - \hat{\mathbf{L}} + \hat{\mathbf{L}}(\mathbf{I} + \hat{\mathbf{L}})^{-1}) = \text{tr}(\mathbf{B}(\mathbf{P}\mathbf{B}^\top\mathbf{B}\mathbf{P} + \mathbf{I})^{-1}\mathbf{B}).$$

The  $\mathbf{P}\mathbf{B}^\top\mathbf{B}\mathbf{P}$  matrix in the above expression been recently analyzed by [CCL<sup>+</sup>19] in the context of RLS sampling who gave the following result that we use in the proof.

**Proposition 3 (CCL<sup>+</sup>19, Lemma 6)** *Let the projection matrix  $\mathbf{P}$  be constructed by sampling  $\mathcal{O}(k \log(\frac{n}{\delta})/\varepsilon^2)$  columns proportionally to their RLS. Then,*

$$(1 - \varepsilon)(\mathbf{B}^\top\mathbf{B} + \mathbf{I}) \preceq \mathbf{P}\mathbf{B}^\top\mathbf{B}\mathbf{P} + \mathbf{I} \preceq (1 + \varepsilon)(\mathbf{B}^\top\mathbf{B} + \mathbf{I}).$$

We decompose the condition into two parts. In the first part, we bound  $k - s \leq 1/2$ , and then bound  $z - \text{tr}(\mathbf{B}(\mathbf{P}\mathbf{B}^\top\mathbf{B}\mathbf{P} + \mathbf{I})^{-1}\mathbf{B}) \leq 1/2$ , see the proof of Theorem 3 for more details. It is easy to see that applying the construction from Proposition 3 leads to the following bound on  $s$ ,

$$s = \text{tr}(\mathbf{B}(\mathbf{P}\mathbf{B}^\top\mathbf{B}\mathbf{P} + \mathbf{I})^{-1}\mathbf{B}) \leq \frac{1}{1 - \varepsilon} \text{tr}(\mathbf{B}(\mathbf{B}^\top\mathbf{B} + \mathbf{I})^{-1}\mathbf{B}) = \frac{1}{1 - \varepsilon} k = k + \frac{\varepsilon}{1 - \varepsilon} k.$$

Tuning  $\varepsilon = 1/(2k + 2)$ , we obtain  $s \leq k + 1/2$  and reordering gives us the desired accuracy result. Similarly, we can invert the bound of Proposition 3 to obtain

$$(\mathbf{B}^\top\mathbf{B} + \mathbf{I})^{-1} \preceq (1 + \varepsilon)(\mathbf{P}\mathbf{B}^\top\mathbf{B}\mathbf{P} + \mathbf{I})^{-1}$$

and therefore,

$$\text{tr}(\mathbf{B}(\mathbf{P}\mathbf{B}^\top\mathbf{B}\mathbf{P} + \mathbf{I})^{-1}\mathbf{B}) \leq (1 + \varepsilon) \text{tr}(\mathbf{B}(\mathbf{B}^\top\mathbf{B} + \mathbf{I})^{-1}\mathbf{B}) = (1 + \varepsilon) z \leq (1 + \varepsilon) k,$$

where the last inequality is due to the fact that  $\hat{\mathbf{L}} \preceq \mathbf{L}$  since it is a Nyström approximation and that the operator  $\text{tr}(\mathbf{L}(\mathbf{L} + \mathbf{I})^{-1})$  is monotone. With the same  $\varepsilon$  as before, we obtain the bound. Summing the two  $1/2$  bounds gives us the result.  $\blacksquare$

Finally, we show how to compute the remaining quantities needed for DPP-VFX (Algorithm 1).

**Lemma 7 (restated Lemma 3)** *Given  $\mathbf{L}$  and an arbitrary Nyström approximation  $\widehat{\mathbf{L}}$  of rank  $m$ , computing  $l_i$ ,  $s$ ,  $z$ , and  $\widetilde{\mathbf{L}}$  requires  $\mathcal{O}(nm^2 + m^3)$  time.*

**Proof** Given the Nyström set  $C$ , let us define the matrix  $\overline{\mathbf{B}} \triangleq \mathbf{L}_{\mathcal{I},C} \mathbf{L}_C^{+/2} \in \mathbb{R}^{n \times m}$  such that  $\widehat{\mathbf{L}} = \overline{\mathbf{B}} \overline{\mathbf{B}}^\top$ . We also introduce  $\widehat{\mathbf{L}}_m \triangleq \overline{\mathbf{B}}^\top \overline{\mathbf{B}}$  to act as a  $\mathbb{R}^{m \times m}$  counterpart to  $\widehat{\mathbf{L}}$ . Denote with  $\mathbf{e}_i$  the  $i$ -th indicator vector. Then, exploiting the fact that  $\overline{\mathbf{B}} \overline{\mathbf{B}}^\top (\mathbf{I} + \overline{\mathbf{B}} \overline{\mathbf{B}}^\top)^{-1} = \overline{\mathbf{B}} (\mathbf{I} + \overline{\mathbf{B}}^\top \overline{\mathbf{B}})^{-1} \overline{\mathbf{B}}^\top$  for any matrix, we can compute  $l_i$  as

$$l_i = [\mathbf{L} - \widehat{\mathbf{L}} + \overline{\mathbf{B}} \overline{\mathbf{B}}^\top (\mathbf{I} + \overline{\mathbf{B}} \overline{\mathbf{B}}^\top)^{-1}]_{ii} = [\mathbf{L} - \widehat{\mathbf{L}}]_{ii} + \|(\mathbf{I} + \widehat{\mathbf{L}}_m)^{-1/2} \overline{\mathbf{B}}^\top \mathbf{e}_i\|_2^2.$$

Computationally, this means that we first need to compute  $\overline{\mathbf{B}}$ , which takes  $\mathcal{O}(m^3)$  time to compute  $\mathbf{L}_{C,C}^{+/2}$ , and  $\mathcal{O}(nm^2)$  time for the matrix multiplication. Then,  $[\widehat{\mathbf{L}}]_{ii}$  is the  $\ell_2$  norm of the  $i$ -th row of  $\overline{\mathbf{B}}$  which can be computed in  $nm$  time. Similarly,  $\|(\mathbf{I} + \widehat{\mathbf{L}}_m)^{-1/2} \overline{\mathbf{B}}^\top \mathbf{e}_i\|_2^2$  requires  $\mathcal{O}(m^3 + nm^2)$  time. To compute  $s$ , we simply sum  $l_i$ , while to compute  $z$  we first compute the eigenvalues of  $\widehat{\mathbf{L}}_m$ ,  $a_i = \lambda(\widehat{\mathbf{L}}_m)_i$ , in  $\mathcal{O}(m^3)$  time, and then compute  $z = \sum_i a_i / (a_i + 1)$ . We can also recycle the eigenvalues to precompute  $\log \det(\mathbf{I} + \widehat{\mathbf{L}}) = \log \det(\mathbf{I} + \widehat{\mathbf{L}}_m) = \sum_i \log(a_i + 1)$ . ■

## B Omitted proofs for the reduction to k-DPPs

In this section we present the proofs omitted from Section 4. Recall that our approach is based on the following rejection sampling strategy,

$$\text{sample } S_\alpha \sim \text{DPP}(\alpha \mathbf{L}), \quad \text{accept if } |S_\alpha| = k.$$

First, we show the existence of the factor  $\alpha^*$  for which the rejection sampling is efficient.

**Theorem 5 (restated Theorem 4)** *There exists constant  $C > 0$  such that for any rank  $n$  PSD matrix  $\mathbf{L}$  and  $k \in [n]$ , there is  $\alpha^* > 0$  with the following property: if we sample  $S_{\alpha^*} \sim \text{DPP}(\alpha^* \mathbf{L})$ , then*

$$\Pr(|S_{\alpha^*}| = k) \geq \frac{1}{C\sqrt{k}}. \quad (1)$$

**Proof** W.l.o.g. assume that  $\mathbf{L}$  is non-zero, and remember  $S_\alpha \sim \text{DPP}(\alpha \mathbf{L})$  with  $k_\alpha = \mathbb{E}[|S_\alpha|]$ . At a high level, the proof proceeds as follows. We first prove that the probability that the size of the subset  $|S_\alpha|$  is equal to its *mode*  $M_\alpha$ , i.e.,  $\Pr(|S_\alpha| = M_\alpha)$  is large enough. Then we show that varying  $\alpha$  can make  $M_\alpha = k$  for any  $k$ , and therefore we can find an  $\alpha^*$  s.t.  $\Pr(|S_{\alpha^*}| = M_{\alpha^*}) = \Pr(|S_{\alpha^*}| = k)$  is large enough. In other words, rescaling  $\text{DPP}(\alpha \mathbf{L})$  to make sure that its mean  $k_\alpha$  is close to  $k$  is sufficient to guarantee that  $|S_\alpha| = k$  with high enough probability.

Our starting point is a standard Chernoff bound for  $|S_\alpha|$ .

**Proposition 4 (PP14)** *Given any PSD matrix  $\mathbf{L}$ , if  $S_\alpha \sim \text{DPP}(\alpha \mathbf{L})$ , then for any  $a > 0$ , we have*

$$\Pr\left(|S_\alpha| - \mathbb{E}[|S_\alpha|] \geq a\right) \leq 5 \exp\left(-\frac{a^2}{16(a + 2\mathbb{E}[|S_\alpha|])}\right).$$

Note that Proposition 4 is not sufficiently strong by itself, i.e., if we tried to bound the distance  $||S_\alpha| - \mathbb{E}[|S_\alpha|]|$  to be smaller than 1 we would get vacuous bounds. However, Proposition 4 implies that there is a constant  $C > 0$  independent of  $\mathbf{L}$  such that  $\Pr(|S_\alpha| - k_\alpha| \geq C\sqrt{k_\alpha} + 1) \leq \frac{1}{2}$  for all  $\alpha > 0$ . In particular, this means that the mode of  $|S_\alpha|$ , i.e.  $M_\alpha = \arg\max_i \Pr(|S_\alpha| = i)$  satisfies

$$\Pr(|S_\alpha| = M_\alpha) \geq \frac{1}{2C\sqrt{k_\alpha}} \sum_{i=-\lceil C\sqrt{k_\alpha} \rceil}^{\lceil C\sqrt{k_\alpha} \rceil} \Pr(|S_\alpha| = k_\alpha + i) \geq \frac{1}{4C\sqrt{k_\alpha}}. \quad (2)$$

The distribution of  $|S_\alpha|$  is given by  $\Pr(|S_\alpha| = i) \propto e_i(\alpha \mathbf{L})$ , where  $e_i(\cdot)$  is the  $i$ th elementary symmetric polynomial of the eigenvalues of a matrix. Denoting  $\lambda_1, \dots, \lambda_n$  as the eigenvalues of  $\mathbf{L}$ ,

we can express the elementary symmetric polynomials as the coefficients of the following univariate polynomial with real non-positive roots,

$$\prod_{i=1}^n (x + \alpha \lambda_i) = \sum_{k=0}^n x^k e_{n-k}(\alpha \mathbf{L}).$$

The non-negative coefficients of such a real-rooted polynomial form a unimodal sequence (Lemma 1.1 in [Bra14]), i.e.,  $e_0(\alpha \mathbf{L}) \leq \dots \leq e_{M_\alpha}(\alpha \mathbf{L}) \geq \dots \geq e_n(\alpha \mathbf{L})$ , with the mode (shared between no more than two positions  $k, k+1$ ) being close to the mean  $k_\alpha$ :  $|M_\alpha - k_\alpha| \leq 1$  (Theorem 2.2 in [Bra14]). Moreover, it is easy to see that  $M_0 = 0$  and  $M_\alpha = n$  for large enough  $\alpha$ , so since the sequence is continuous w.r.t.  $\alpha$ , for every  $k \in [n]$  there is an  $\alpha^*$  such that  $\Pr(|S_{\alpha^*}| = k) = \Pr(|S_{\alpha^*}| = M_{\alpha^*})$  (every  $k$  can become one of the modes). In light of (2), this means that

$$\Pr(|S_{\alpha^*}| = k) \geq \frac{1}{4C\sqrt{k_{\alpha^*}}} \geq \frac{1}{4C\sqrt{k+1}},$$

where the last inequality holds because  $|k - k_{\alpha^*}| \leq 1$ . ■

Finally, we show how to find  $\alpha^*$  efficiently.

**Lemma 8** *If  $k \geq 1$  there is an algorithm that finds  $\alpha^*$  in  $\mathcal{O}(n \cdot \text{poly}(k))$  time.*

**Proof** In order to leverage Theorem 4, we need to find an  $\alpha^*$  such that  $k = M_{\alpha^*}$ , that is such that the mode of  $\text{DPP}(\alpha^* \mathbf{L})$  is equal to  $k$ . Unfortunately simple unimodality is not sufficient to control  $M_{\alpha^*}$  when  $\alpha^*$  is perturbed, as it happens during an approximate optimization of  $\alpha$ . We now characterize more in detail the distribution of  $|S_\alpha|$ .

In particular,  $|S_\alpha|$  can be defined as the sum of Bernoullis  $|S_\alpha| = \sum_{i=1}^n b_{\alpha,i}$  each distributed according to  $b_{\alpha,i} \sim \text{Bernoulli}(\lambda_i(\alpha \mathbf{L}) / (1 + \lambda_i(\alpha \mathbf{L})))$  [HKP<sup>+</sup>06]. The sum of independent but not identically distributed Bernoullis is a so-called Poisson binomial random variable [H<sup>+</sup>56]. More importantly, the following result holds for Poisson binomial random variable.

**Proposition 5 (D<sup>+</sup>64, Theorem 4)** *Given a Poisson binomial r.v.  $|S_\alpha|$  with mean  $k_\alpha$ , let  $k \triangleq \lfloor k_\alpha \rfloor$ . The mode  $M_\alpha$  is*

$$M_\alpha = \begin{cases} k & \text{if } k \leq k_\alpha < k + \frac{1}{k+2}, \\ k \text{ or } k+1 & \text{if } k + \frac{1}{k+2} \leq k_\alpha \leq k + 1 - \frac{1}{n-k+1}, \\ k+1 & \text{if } k + 1 - \frac{1}{n-k+1} < k_\alpha \leq k + 1. \end{cases}$$

Therefore it is sufficient to find any constant  $\alpha^*$  that places  $k_{\alpha^*}$  in the interval  $[k, k + \frac{1}{k+2})$ . Unfortunately, while the formula for  $k_\alpha = \sum_{i=1}^n \lambda_i(\mathbf{L}) / (1 + \lambda_i(\mathbf{L}))$  is a unimodal function of the eigenvalues of  $\mathbf{L}$  which is easy to optimize, the eigenvalues themselves are still very expensive to compute. For efficiency, we can optimize it instead on the eigenvalues of a Nyström approximation  $\hat{\mathbf{L}}$ , but we have to be careful to control the error. In particular, remember that  $k_\alpha = \mathbb{E}[|S_\alpha|]$  when  $S \sim \text{DPP}(\alpha \mathbf{L})$ , so given a Nyström approximation  $\hat{\mathbf{L}}$  we can define  $s_\alpha \triangleq \text{tr}(\alpha(\mathbf{L} - \hat{\mathbf{L}}) + \hat{\mathbf{L}}(\hat{\mathbf{L}} + \mathbf{I}/\alpha)^{-1})$  as a quantity analogous to  $s$  from DPP-VFX. Then, we can strengthen Lemma 2 as follows.

**Lemma 9 (see also Lemma 2)** *Let  $\hat{\mathbf{L}}$  be constructed by sampling  $m = \mathcal{O}((k_\alpha/\varepsilon^2) \log(n/\delta))$  columns proportionally to their RLS. Then with probability  $1 - \delta$*

$$\frac{1}{1+\varepsilon} k_\alpha \leq s_\alpha \leq \frac{1}{1-\varepsilon} k_\alpha.$$

**Proof of Lemma 9** We simply apply the same reasoning of Lemma 2 on both sides. ■

Let  $(1 - \varepsilon)s_{\alpha^*} = k$ , with  $\varepsilon$  that we tune shortly. Then proving the first inequality to satisfy Proposition 5 is straightforward,  $k = (1 - \varepsilon)s_{\alpha^*} \leq k_{\alpha^*}$ . To satisfy the other side we upper bound  $k_{\alpha^*} \leq (1 + \varepsilon)s_{\alpha^*} = (1 - \varepsilon)s_{\alpha^*} + 2\varepsilon s_{\alpha^*}$ . We must now choose  $\varepsilon$  such that  $2\varepsilon s_{\alpha^*} = 1/(k+3) < 1/(k+2)$ . Substituting, we obtain  $\varepsilon = \frac{1}{2(k+3)s_{\alpha^*}}$ . Plugging this in the definition of  $s_{\alpha^*}$  we obtain that  $\alpha^*$  must be optimized to satisfy

$$s_{\alpha^*} = \frac{2k^2 + 6k + 1}{2k + 6},$$

which we plug in the definition of  $\varepsilon$  obtaining our necessary accuracy  $\varepsilon = 1/(2k^2 + 6k + 1)$ . Therefore, sampling  $m = \tilde{\mathcal{O}}(k_{\alpha^*} k^4)$  columns gives us a  $s_{\alpha}$  sufficiently accurate to be optimized. However, we still need to bound  $k_{\alpha^*}$ , which we can do as follows using Lemma 9 and  $k \geq 1$ ,

$$\begin{aligned} k_{\alpha^*} &\leq \left(1 + \frac{1}{2k^2 + 6k + 1}\right) s_{\alpha^*} \leq \left(1 + \frac{1}{9}\right) s_{\alpha^*} = \frac{10}{9} s_{\alpha^*} \\ &\leq \frac{10}{9} \left(\frac{2k^2 + 6k + 1}{2k + 6}\right) = \frac{10}{9} \left(1 + \frac{1}{k(2k + 6)}\right) k = \frac{10}{9} \frac{9}{8} k = \frac{5}{4} k. \end{aligned}$$

Therefore  $m = \tilde{\mathcal{O}}(k_{\alpha^*} k^4) \leq \tilde{\mathcal{O}}(k^5)$  suffices for the accuracy. Moreover, since  $s_{\alpha}$  is parametrized only in terms of the eigenvalues of  $\hat{\mathbf{L}}$ , which can be found in  $\tilde{\mathcal{O}}(nm^2 + m^3)$  time, we can compute an  $\alpha^*$  such that  $s_{\alpha^*} = \frac{2k^2 + 6k + 1}{2k + 6}$  in  $\tilde{\mathcal{O}}(nk^{10} + k^{15})$  time, which guarantees  $k \leq k_{\alpha^*} < k + \frac{1}{k+2}$ . ■

Finally, note that the bounds on the accuracy of  $\hat{\mathbf{L}}$  are extremely conservative. In deployment, it is much faster to try to optimize  $\alpha^*$  on a much coarser  $\hat{\mathbf{L}}$  first, e.g., for  $m = \mathcal{O}(k_1)$ , and only if this approach fails, then to increase the accuracy of  $\hat{\mathbf{L}}$ .
